# Supplementary material for: On the Interplay of Telomeres, Nevi and the Risk of Melanoma
Source: PLoS One. 2012 Dec 27;7(12):e52466. doi: 10.1371/journal.pone.0052466 (PMC3531488; doi:10.1371/journal.pone.0052466)
Supplement: Figure S2 — (DOC) [file pone.0052466.s002.doc]

**Figure S2.** Linkage disequilibrium (LD) structure for the RECQL4 region.

**
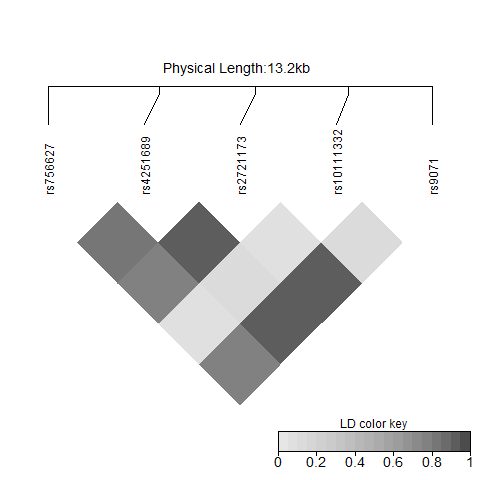
**

**Figure S2 legend.** LD structure for the SNPs in the RECQL4 region among non-melanoma subjects. Based on r2 values.
