# Supplementary material for: On the Interplay of Telomeres, Nevi and the Risk of Melanoma
Source: PLoS One. 2012 Dec 27;7(12):e52466. doi: 10.1371/journal.pone.0052466 (PMC3531488; doi:10.1371/journal.pone.0052466)
Supplement: Figure S4 — (DOC) [file pone.0052466.s004.doc]

**Figure S4.** LD structure for the RTEL1 region.

**
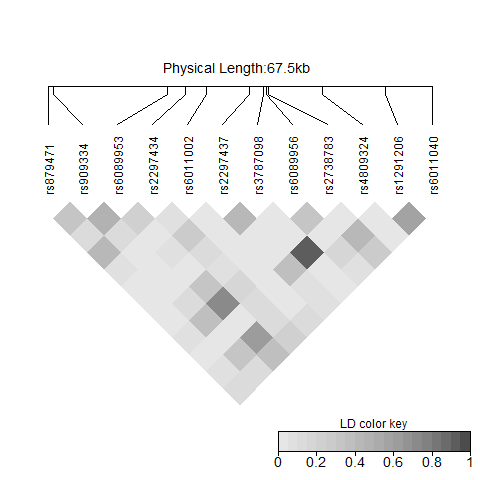
**

**Figure S4 legend.** LD structure for the SNPs in the RTEL1 region in subjects without dysplastic nevi nor melanoma. Based on r2 values.
